# Supplementary material
Source: Springer Nature journal article supplement (https://www.springermedizin.de/resource/supplementary/12978_2011_117_MOESM3_ESM.pdf/9602884)

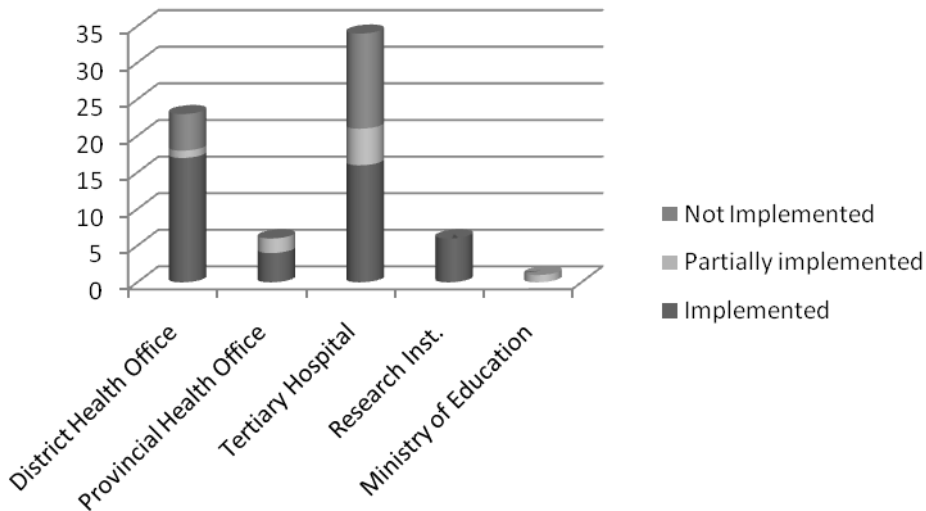

Supplement: MOESM3 [file 9602884]
